# Supplementary material for: A cascade toehold-mediated strand displacement strategy for label-free and sensitive non-enzymatic recycling amplification detection of the HIV-1 gene
Source: Royal Society of Chemistry journal article supplement (doi:10.1039/c8an02340a), 2019-01-01
Supplement: c8an02340a1.pdf [file c8an02340a1.pdf]

**Cascade toehold-mediated strand displacement strategy for label-free and sensitivity non-enzymatic recycling amplification detection of the *HIV-1* gene**

Qiong Li,<sup>a,b#</sup> Zhi Liu,<sup>a#</sup> Danhua Zhou,<sup>b,c</sup> Jiafeng Pan,<sup>b</sup> Chengshuai Liu<sup>d</sup> and Junhua Chen<sup>\*b</sup>

<sup>a</sup>College of Bioscience and Biotechnology, Hunan Agricultural University, Changsha 410128, China.

<sup>b</sup>Guangdong Key Laboratory of Integrated Agro-environmental Pollution Control and Management, Guangdong Institute of Eco-Environmental and Science & Technology, Guangzhou 510650, China.

<sup>c</sup>College of Natural Resources and Environment, South China Agricultural University, Guangzhou 510642, China.

<sup>d</sup>State Key Laboratory of Environmental Geochemistry, Institute of Geochemistry, Chinese academy of Sciences, Guiyang 550081, China.

**\*Corresponding author:**

E-mail: 222chenjunhua@163.com; jhchen@soil.gd.cn.

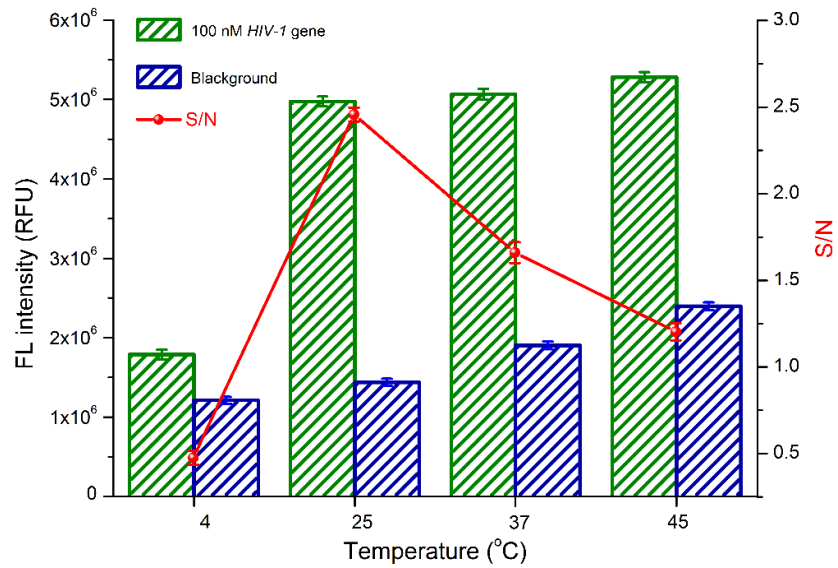

Fig. S1 Effect of the reaction temperature on the response of the sensing system. The histograms represent the fluorescence intensity of the solution in the presence of 100 nM *HIV-1* gene (green) and in the absence of the *HIV-1* gene (blue), respectively. The red line represents the S/N ratio. The corresponding error bars represent the standard deviation of three independent measurements obtained at each reaction temperature.

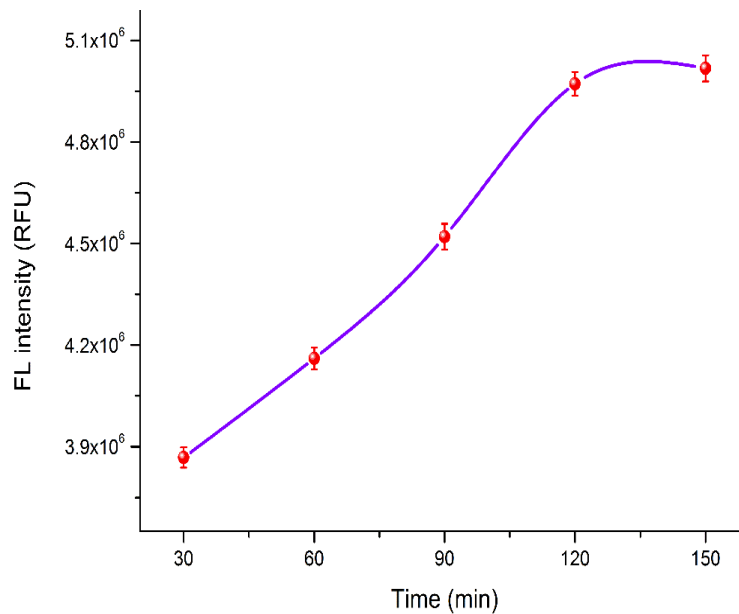

Fig. S2 Effect of the reaction time of the signal amplification on the fluorescence intensity of the proposed method for the detection of the *HIV-1* gene (100 nM). Reactions were performed at room temperature.

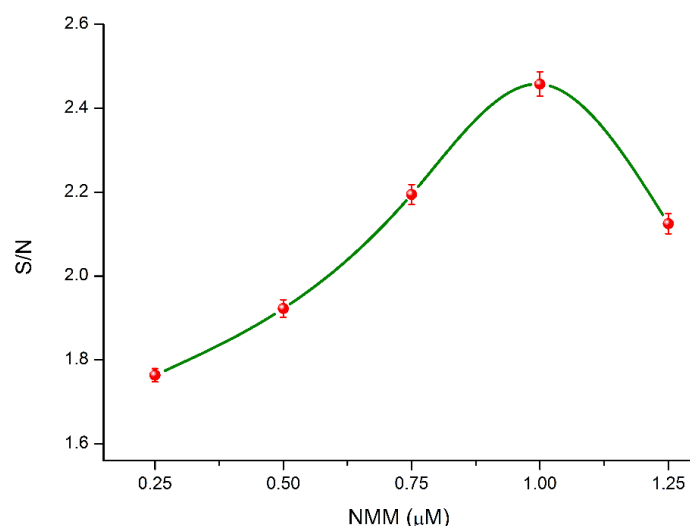

Fig. S3 Effect of the NMM concentration on the performance of the sensing system. The *HIV-1* gene concentration is 100 nM. Incubation temperature and reaction time were 25 °C and 120 min, respectively.

Table. S1 Comparison of the analytical methods capable of sensing the *HIV-1* gene

| Method                                                             | Linear range  | Detection Limit | References |
|--------------------------------------------------------------------|---------------|-----------------|------------|
| Electrochemical biosensor based on amperometry                     | 10 pM–50 nM   | 18 pM           | 1          |
| Electrochemical biosensor based on a nafion-graphene composite     | 40 nM–2.56 μM | 5 nM            | 2          |
| Electrochemical biosensor based on a Closed Bipolar                | 100 pM–300 nM | 30 pM           | 3          |
| Electrochemical biosensor based on a triplex-oligonucleotide probe | 0.1-10 nM     | 54 pM           | 4          |
| Colorimetry biosensor base on a multi-amplification Nanoplatform   | 10 pM-120 nM  | 4.8 pM          | 5          |
| Fluorescence biosensor base on grapheme oxide                      | 7–80 nM       | 3 nM            | 6          |
| Fluorescence biosensor base on fluorescence polarization           | 50 pM-8 nM    | 9.12 pM         | 7          |
| Fluorescence biosensor base on TMSDRs                              | 10 pM-1 μM    | 1.9 pM          | This work  |

### Reference

1. X. Gao, X. Wang, Y. Li, J. He and H. Yu, *Anal. Chem.*, 2018, **90**, pp 8147-8153.
2. B. Li , Z. Li, B. Situ, Z. Dai, Q. Liu, Q. Wang, D. Gu and L. Zheng, *Biosens. Bioelectron.*, 2014, **52**, 330-336.
3. R. Poorghasem, R. S. Saberi, M. Shayan, M. A. Mehrgardi and A. Kiani, *Electrochim. Acta.*, 2016, **222**, 1483-1490.
4. X. Wang, A. Jiang, T. Hou and F. Li, *Anal. Chim. Acta.*, 2015, **890**, 91-97.
5. Y. Long, C. Zhou, C. Wang, H. Cai, C. Yin, Q. Yang and D. Xiao, *Sci. Rep.*, 2016, **6**, 23949.
6. L. Chen, L. Song, Y. Zhang, P. Wang, Z. Xiao, Y. Guo and F. Cao, *ACS Appl. Mater. Inter.*, 2016, **8**, 11255-11261.
7. L. Wang, J. Tian, Y. Huang, X. Lin, W. Yang, Y. Zhao and S. Zhao, *Microchim. Acta.*, 2016, **183**, 2147-2153.
